# Supplementary material for: NADPH oxidase 1 is highly expressed in human large and small bowel cancers
Source: PubMed Central journal article supplement (PMC7237001; doi:10.1371/journal.pone.0233208), 2020-05-19
Supplement: pone.0233208.s006.pdf [file pone.0233208.s006.pdf]

**S1 Table.** ELISA screening and isotyping of 3 positive hybridoma clones using HNC immunogen and His-tag.

| <b>Clone No.</b> | <b>HNC-His</b> | <b>His-tag</b> | <b>Isotype</b> |
|------------------|----------------|----------------|----------------|
| #4               | 1.197          | 0.111          | G1             |
| #22              | 1.227          | 0.082          | G2b            |
| #55              | 1.223          | 0.027          | G2a            |
| Blank control    | 0.081          | 0.09           | -              |
| Negative control | 0.037          | 0.047          | -              |
| Positive control | -0.048         | 1.025          | -              |
